# Supplementary material for: Inhibitory mechanism study of soyasaponins on thrombin: extraction, purification, and functional property analysis
Source: Royal Society of Chemistry journal article supplement (doi:10.1039/d5fo00522a), 2025-01-01
Supplement: d5fo00522a1.pdf [file d5fo00522a1.pdf]

|              |     |                           |         |                                                                                                                         |
|--------------|-----|---------------------------|---------|-------------------------------------------------------------------------------------------------------------------------|
| 1DWC_1 Chain | 1   | . . . . .                 | T F G S | G E A D C G L R P L F E K K S L E D K T E R E L L E S Y I D G R I V E G S D A E I G M                                   |
| 1MKW Chain   | 1   | T S E D H F Q P F F N E K | T F G A | G E A D C G L R P L F E K K Q V Q D Q T E K E L F E S Y I E G R I V E G Q D A E V G L                                   |
| 1DWC_1 Chain | 48  |                           |         | S P W Q V M L F R K S P Q E L L C G A S L I S D R W V L T A A H C L L Y P P W D K N F T E N D L L V R I G K H S R T R Y |
| 1MKW Chain   | 61  |                           |         | S P W Q V M L F R K S P Q E L L C G A S L I S D R W V L T A A H C L L Y P P W D K N F T V D D L L V R I G K H S R T R Y |
| 1DWC_1 Chain | 108 |                           |         | E R N I E K I S M L E K I Y I H P R Y N W R E N L D R D I A L M K L K K P V A F S D Y I H P V C L P D R E T A A S L L Q |
| 1MKW Chain   | 121 |                           |         | E R K V E K I S M L D K I Y I H P R Y N W K E N L D R D I A L L K L K R P I E L S D Y I H P V C L P D K Q T A A K L L H |
| 1DWC_1 Chain | 168 |                           |         | A G Y K G R V T G W G N L K E T W T A N V G K G Q P S V L Q V V N L P I V E R P V C K D S T R I R I T D N M F C A G Y K |
| 1MKW Chain   | 181 |                           |         | A G E K G R V T G W G N R R E T W T T S V A E V Q P S V L Q V V N L P L V E R P V C K A S T R I R I T D N M F C A G Y K |
| 1DWC_1 Chain | 228 |                           |         | P D E G K R G D A C E G D S G G P F V M K S P F N N R W Y Q M G I V S W G E G C D R D G K Y G F Y T H V F R L K K W I Q |
| 1MKW Chain   | 241 |                           |         | P G E G K R G D A C E G D S G G P F V M K S P Y N N R W Y Q M G I V S W G E G C D R D G K Y G F Y T H V F R L K K W I Q |
| 1DWC_1 Chain | 288 |                           |         | K V I D Q F G E                                                                                                         |
| 1MKW Chain   | 301 |                           |         | K V I D R L G S                                                                                                         |

S1 Human thrombin (1 DWC) and bovine thrombin (1 MKW) amino acid sequence alignment.
